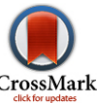

## Correction

# Correction: Spectral Parameters Modulation and Source Localization of Blink-Related Alpha and Low-Beta Oscillations Differentiate Minimally Conscious State from Vegetative State/Unresponsive Wakefulness Syndrome

The *PLOS ONE* Staff

There is an error in the legend for File S2. Please see the correct legend here.

## Supporting Information

**File S2. Contains three exemplary EEG recordings in Matlab format, one related to a healthy subject, one to a MCS patient and one to a VS/UWS patient.**

## Reference

1. Bonfiglio L, Piarulli A, Olcese U, Andre P, Arrighi P, et al. (2014) Spectral Parameters Modulation and Source Localization of Blink-Related Alpha and Low-Beta Oscillations Differentiate Minimally Conscious State from Vegetative State/Unresponsive Wakefulness Syndrome. *PLoS ONE* 9(3): e93252. doi:10.1371/journal.pone.0093252

**Citation:** The *PLOS ONE* Staff (2014) Correction: Spectral Parameters Modulation and Source Localization of Blink-Related Alpha and Low-Beta Oscillations Differentiate Minimally Conscious State from Vegetative State/Unresponsive Wakefulness Syndrome. *PLoS ONE* 9(4): e95948. doi:10.1371/journal.pone.0095948

**Published:** April 23, 2014

**Copyright:** © 2014 The *PLOS ONE* Staff. This is an open-access article distributed under the terms of the Creative Commons Attribution License, which permits unrestricted use, distribution, and reproduction in any medium, provided the original author and source are credited.
